# Supplementary material
Source: ML conference proceedings conference paper supplement (https://openaccess.thecvf.com/content/CVPR2023/html/Yang_Towards_Bridging_the_CVPR_2023_paper.html)
Supplement: Supplementary file 1 [file Yang_Towards_Bridging_the_CVPR_2023_supplemental.pdf]

# Towards Bridging the Performance Gaps of Joint Energy-based Models

## Supplementary Material

Xiulong Yang, Qing Su, and Shihao Ji  
Georgia State University  
{xyang22, qsu3, sji}@gsu.edu

### A. Experimental Details

To have a fair comparison, we largely follow the settings of JEM [2] and JEM++ [5], and train our models based on the Wide-ResNet 28x10 architecture [6] for 200 epochs. We use SGD for CIFAR10 and CIFAR100 with an initial learning rate of 0.1 and 0.01, respectively, and decay the learning rate by 0.2 at epoch [60, 120, 180] for most cases. Apart from this, we find that the cosine learning rate scheduler can be adopted for SADA-JEM, which achieves much better accuracy and FID on CIFAR10.<sup>1</sup> The hyper-parameters used in our experiments are listed in Table 1.

Table 1. Hyper-parameters of SADA-JEM for CIFAR10 and CIFAR100.

| Variable                        | Value     |
|---------------------------------|-----------|
| Number of SGLD steps $K$        | 5, 10, 20 |
| Buffer size $ \mathbb{B} $      | 10,000    |
| Reinitialization freq. $\gamma$ | 5%        |
| SGLD step-size $\alpha$         | 1         |
| SGLD noise $\sigma$             | 0         |
| SAM noise radius $\rho$         | 0.2       |

### B. Visualizing Generated Images

Table 1 in the main text reports the quantitative performance comparison of different stand-alone generative models and hybrid models. Here in Figure 1 we provide a qualitative comparison of generated images from (a) SADA-JEM, (b) VERA [3], and (c) DiffuRecov [1]. As we can see, the perceived image qualities of them are comparable even though DiffuRecov has a much better FID score than that of VERA (9.58 vs. 30.5), indicating that visualizing generated images is less effective to evaluate image quality.

<sup>1</sup>This is because the combination of SAM and single branched DA improves the training stability significantly. As a result, the cosine learning rate decay can be adopted to improve the overall performance. JEM, JEM++ and other SADA-JEM ablation configurations are less stable to enable the cosine learning rate decay.

### C. Energy Landscapes

Figure 2 illustrates the energy landscapes of different models trained on CIFAR10. The energy landscape is generated by visualizing  $E(\theta) = \sum_{\mathbf{x} \in X} E_{\theta}(\mathbf{x})$  with the technique introduced in [4], where  $X$  is a 10% random samples from CIFAR10 training data. As we can see, SADA-JEM’s energy landscapes are much smoother than those of the competing methods (see different scales of the y-axes).

### D. Out-of-Distribution Detection

Table 2 reports the OOD detection performances of different models and SADA-JEM with different  $K$ s, where the input density  $\log p_{\theta}(\mathbf{x})$  is used as  $s_{\theta}(\mathbf{x})$  for OOD detection on CIFAR10.

### E. Additional Generated Samples

Additional SADA-JEM generated class-conditional (best and worst) samples of CIFAR10 are provided in Figures 3-12.

### References

- [1] Ruiqi Gao, Yang Song, Ben Poole, Ying Nian Wu, and Diederik P. Kingma. Learning Energy-Based Models by Diffusion Recovery Likelihood. In *ICLR*, 2021. 1
- [2] Will Grathwohl, Kuan-Chieh Wang, Joern-Henrik Jacobsen, David Duvenaud, Mohammad Norouzi, and Kevin Swersky. Your classifier is secretly an energy based model and you should treat it like one. In *International Conference on Learning Representations (ICLR)*, 2020. 1
- [3] Will Sussman Grathwohl, Jacob Jin Kelly, Milad Hashemi, Mohammad Norouzi, Kevin Swersky, and David Duvenaud. No mcmc for me: Amortized sampling for fast and stable training of energy-based models. In *ICLR*, 2021. 1
- [4] Hao Li, Zheng Xu, Gavin Taylor, Christoph Studer, and Tom Goldstein. Visualizing the Loss Landscape of Neural Nets. In *Neural Information Processing Systems (NeurIPS)*, 2018. 1
- [5] Xiulong Yang and Shihao Ji. JEM++: Improved Techniques for Training JEM. In *International Conference on Computer Vision (ICCV)*, 2021. 1
- [6] Sergey Zagoruyko and Nikos Komodakis. Wide residual networks. In *BMVC*, 2016. 1

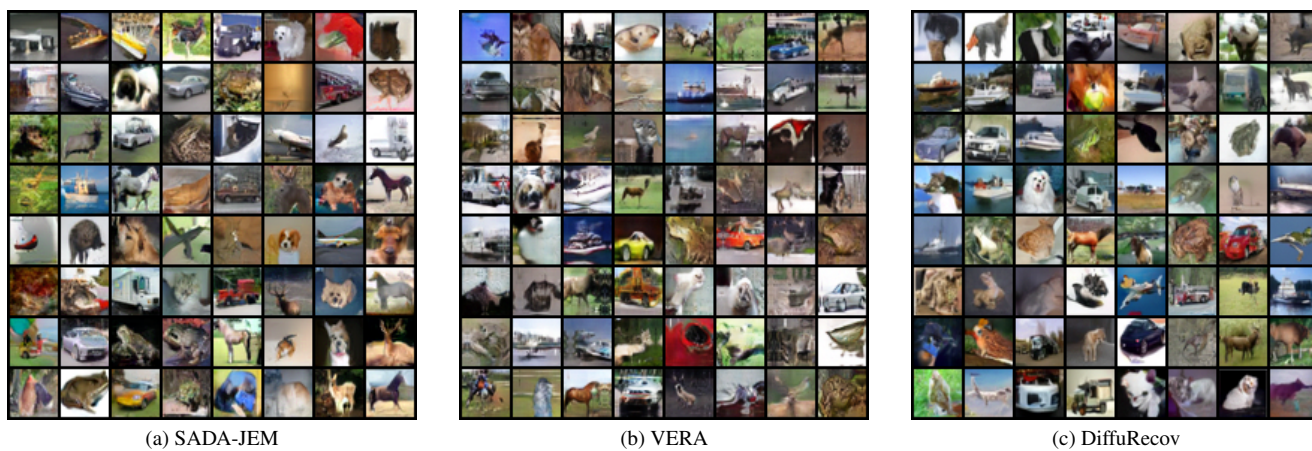

Figure 1. Generated images from SADA-JEM, VERA, and DiffuRecov.

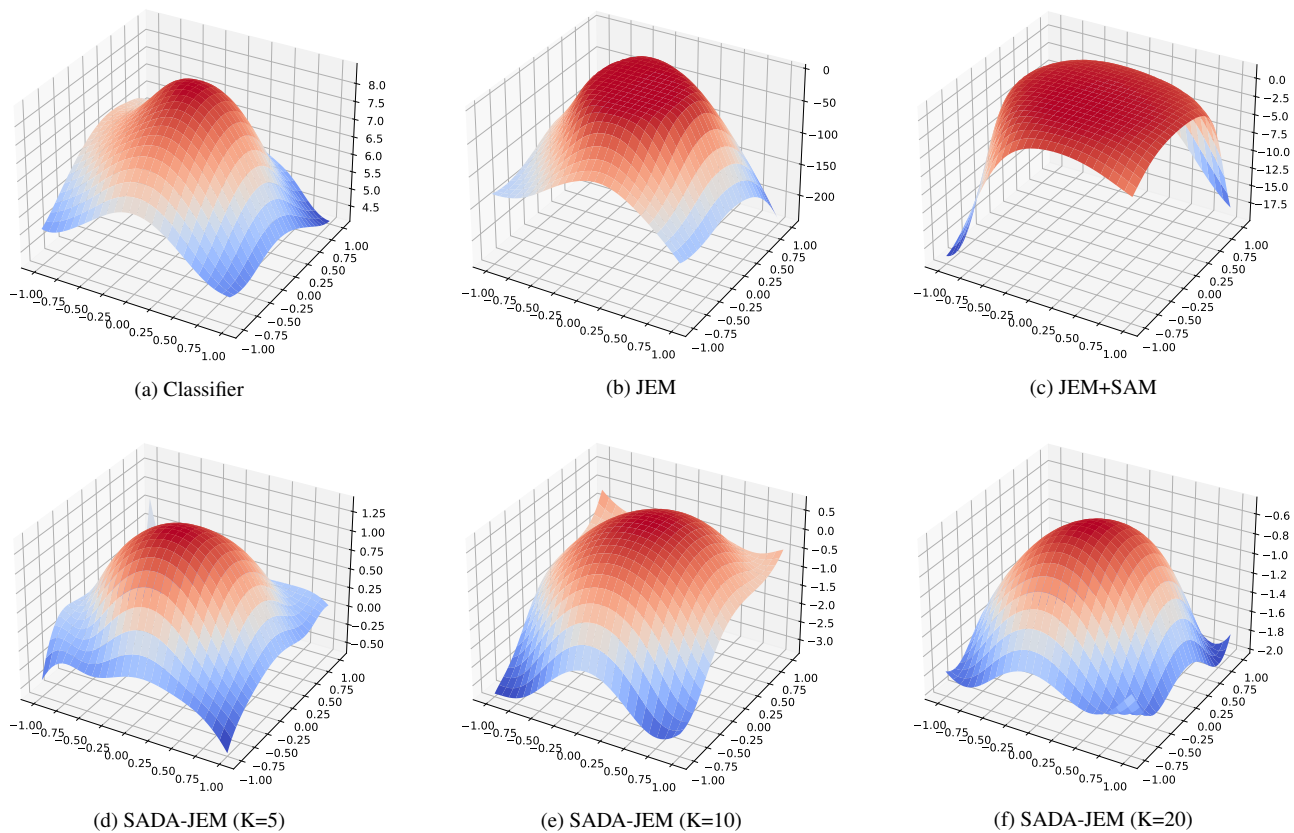

Figure 2. Energy landscapes of different models trained on CIFAR10. Please note the different scales of the y-axes.

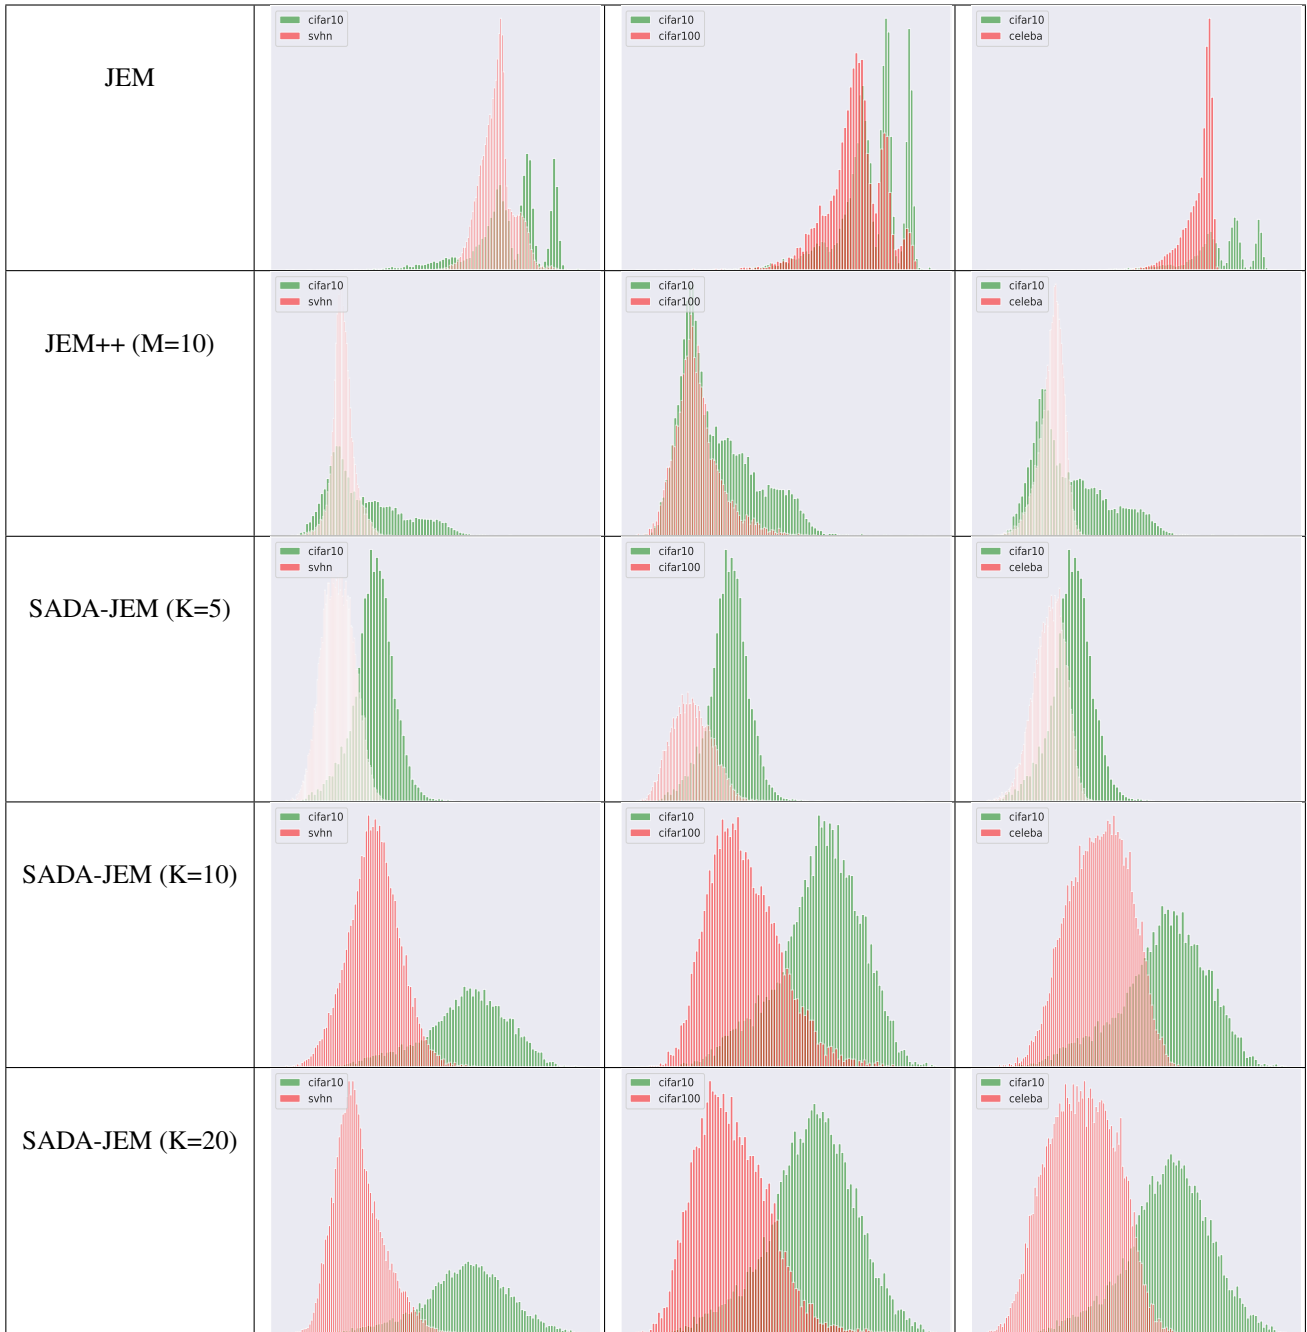

Table 2. Histograms of  $\log p_{\theta}(\mathbf{x})$  for OOD detection. Green corresponds to in-distribution dataset, while red corresponds to OOD dataset.

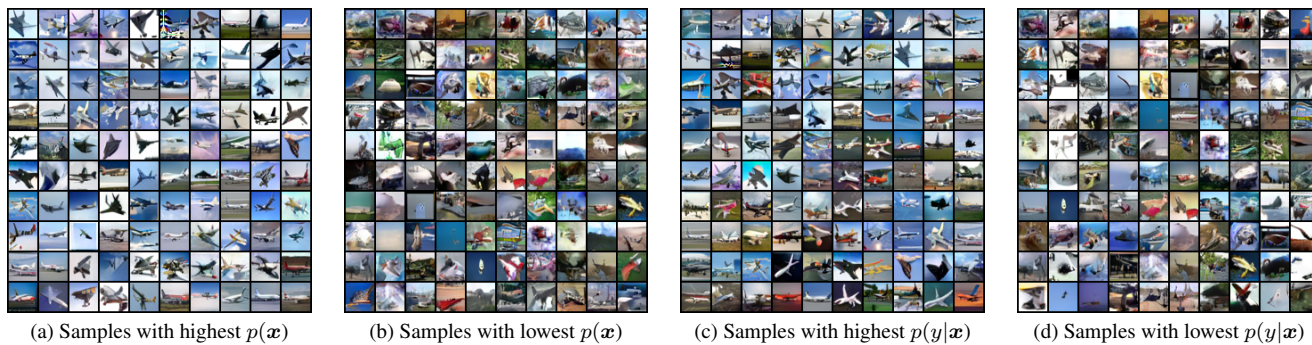

Figure 3. SADA-JEM generated class-conditional samples of **Plane**.

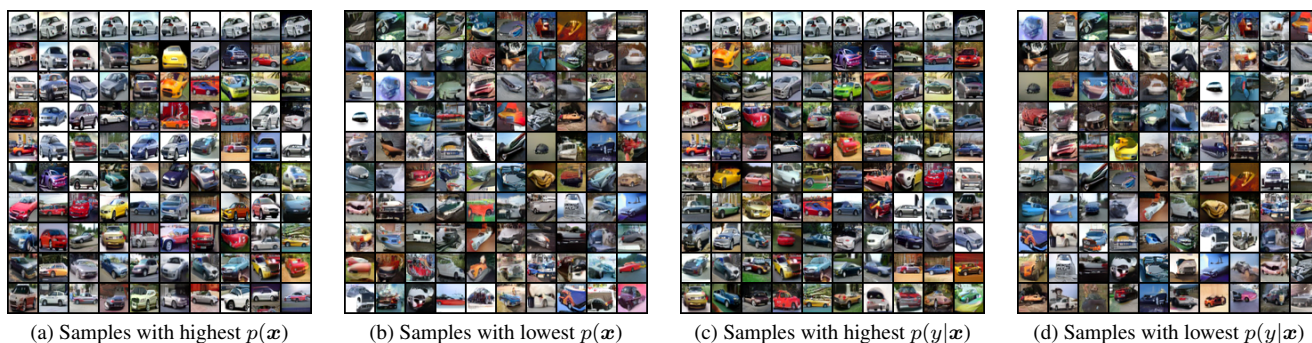

Figure 4. SADA-JEM generated class-conditional samples of **Car**.

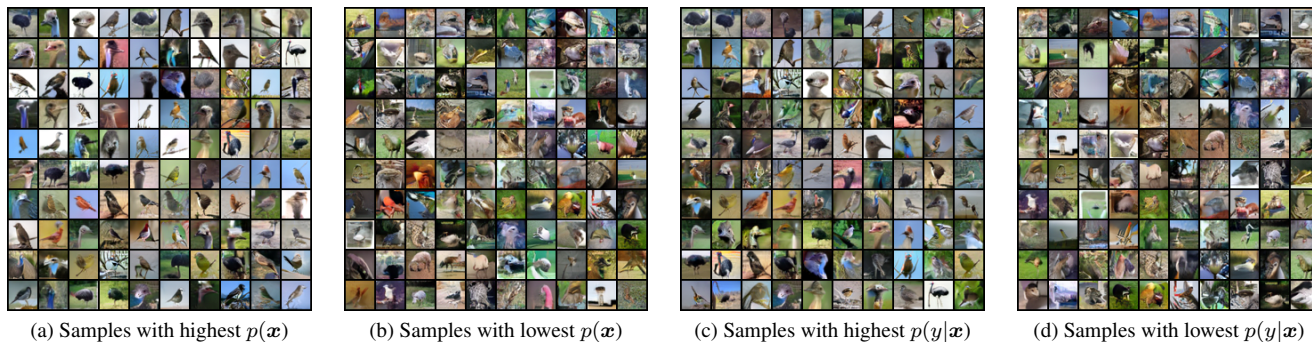

Figure 5. SADA-JEM generated class-conditional samples of **Bird**.

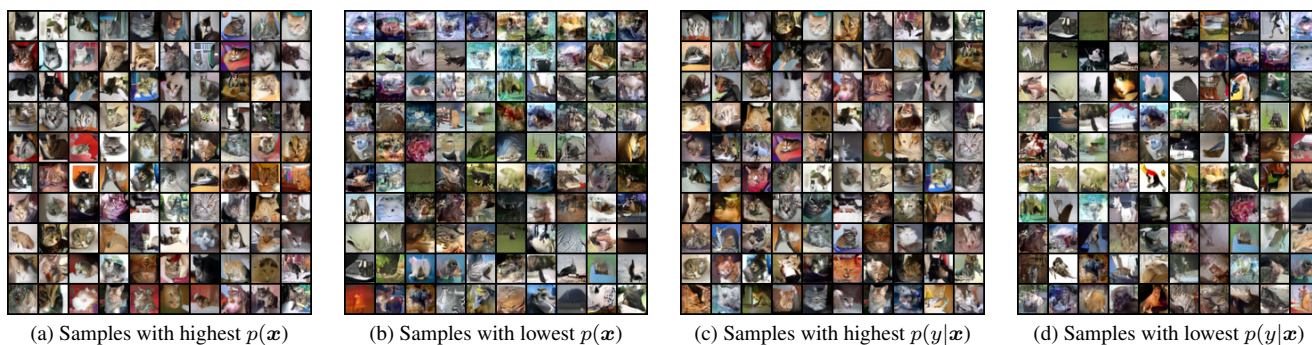

Figure 6. SADA-JEM generated class-conditional samples of **Cat**.

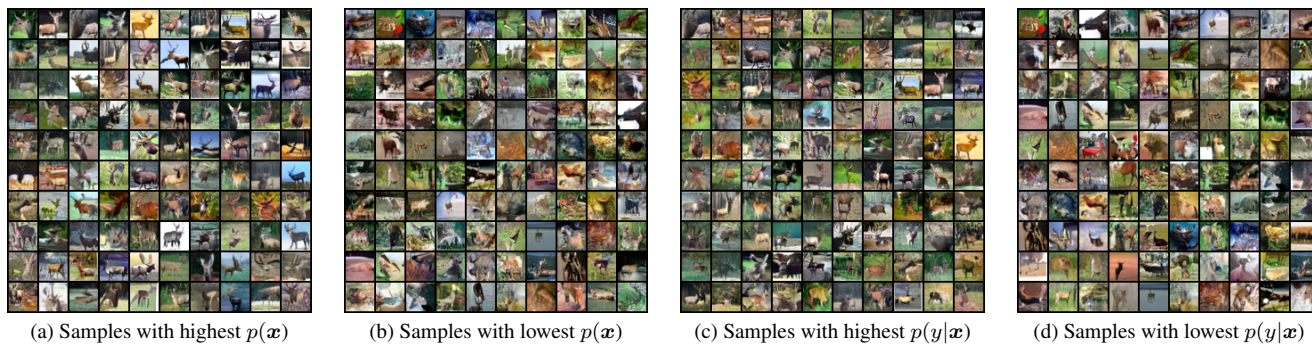

Figure 7. SADA-JEM generated class-conditional samples of **Deer**.

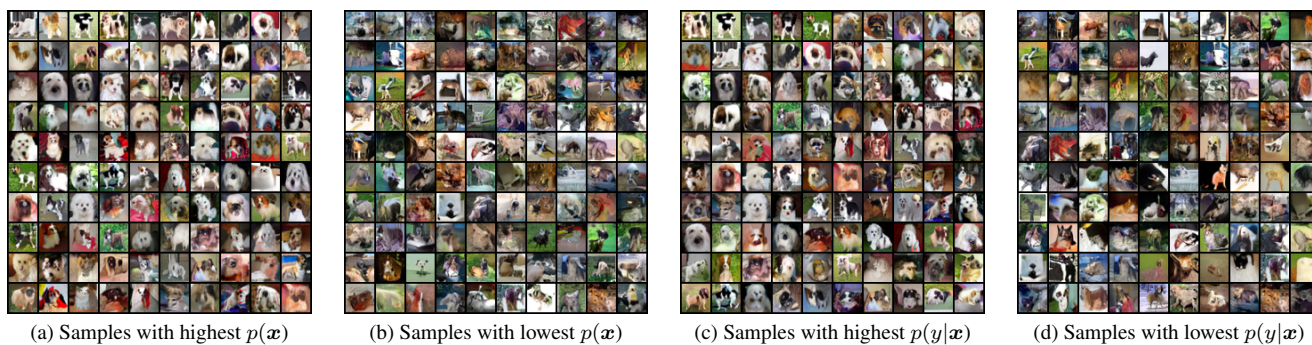

Figure 8. SADA-JEM generated class-conditional samples of **Dog**.

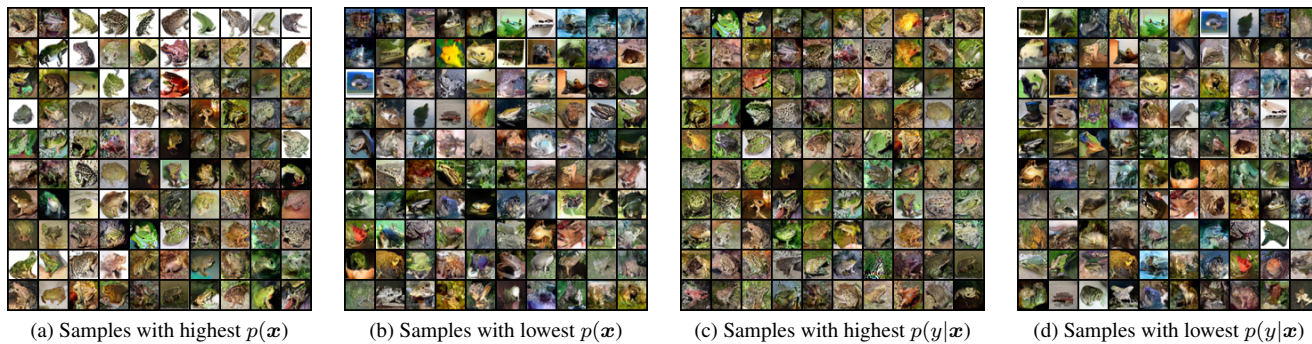

Figure 9. SADA-JEM generated class-conditional samples of **Frog**.

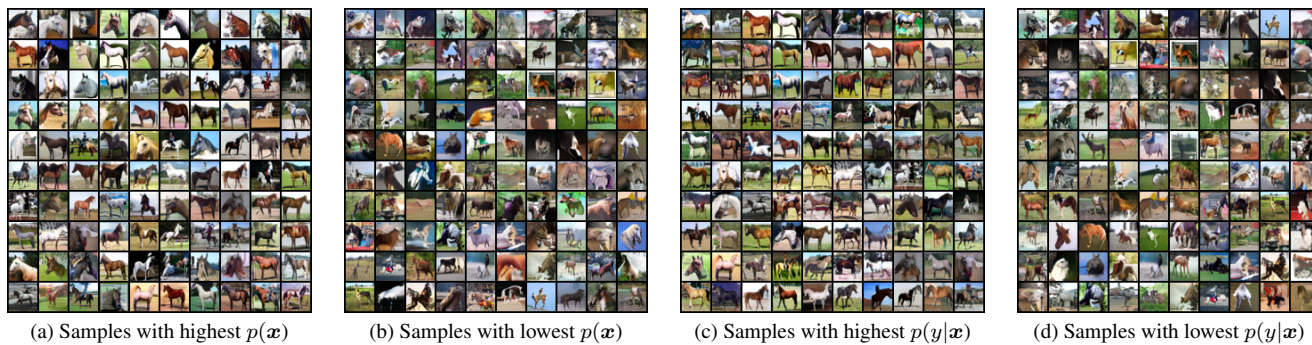

Figure 10. SADA-JEM generated class-conditional samples of **Horse**.

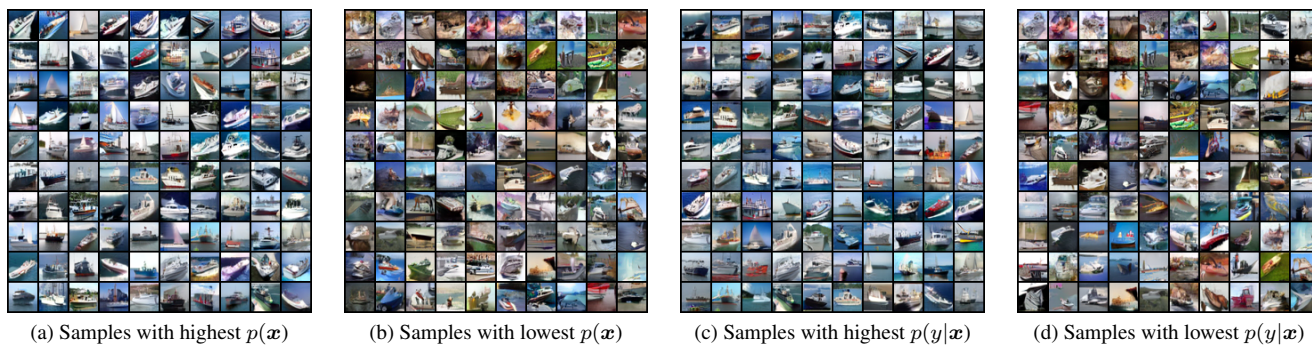

Figure 11. SADA-JEM generated class-conditional samples of **Ship**.

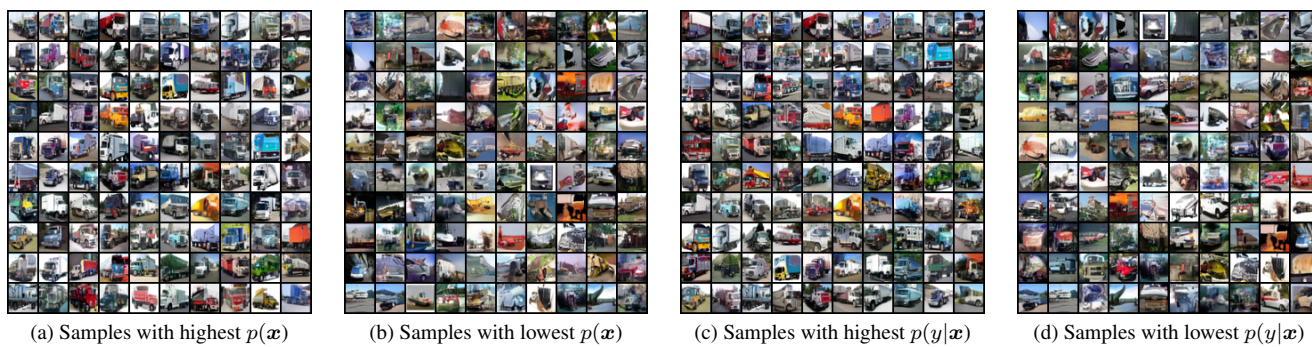

Figure 12. SADA-JEM generated class-conditional samples of **Truck**.
